# Supplementary material for: Covalent triazine framework-decorated phenyl-functionalised SBA-15: its synthesis and application as a novel nanoporous adsorbent
Source: Royal Society of Chemistry journal article supplement (doi:10.1039/c9nj01915d), 2019-01-01
Supplement: c9nj01915d1.pdf [file c9nj01915d1.pdf]

Electronic Supplementary Information

**Covalent triazine framework-decorated phenyl-functionalized SBA-15:  
Synthesis and application as a novel nanoporous adsorbent**

Roosbeh Soltani, Ali Shahvar, Hasti Gordan, Mohammad Dinari and Mohammad Saraji\*

\*Correspondence:

Mohammad Saraji, Department of Chemistry, Isfahan University of Technology, Isfahan 84156-83111, Iran, E-mail: saraji@cc.iut.ac.ir

**Table S1.** The list of adsorption equilibrium, kinetics, and thermodynamic equations.

|                                                                                                                                                                                                                                                                                                                                                                                                                                                                                                                                                                                                                                                                                                                                                                                                                                                                                                                                                                                                                                                                                                                                                                                                                                                                                                                                                                                                                                                                                                                                                                                                                                                                                                                                                                                                                                                                                                                                                                                                                                                                                                                                                                                                                                                                                                                                                                                                                                                                                                                                                                                                                                                                                                                |                                                                                  |                                                                   |
|----------------------------------------------------------------------------------------------------------------------------------------------------------------------------------------------------------------------------------------------------------------------------------------------------------------------------------------------------------------------------------------------------------------------------------------------------------------------------------------------------------------------------------------------------------------------------------------------------------------------------------------------------------------------------------------------------------------------------------------------------------------------------------------------------------------------------------------------------------------------------------------------------------------------------------------------------------------------------------------------------------------------------------------------------------------------------------------------------------------------------------------------------------------------------------------------------------------------------------------------------------------------------------------------------------------------------------------------------------------------------------------------------------------------------------------------------------------------------------------------------------------------------------------------------------------------------------------------------------------------------------------------------------------------------------------------------------------------------------------------------------------------------------------------------------------------------------------------------------------------------------------------------------------------------------------------------------------------------------------------------------------------------------------------------------------------------------------------------------------------------------------------------------------------------------------------------------------------------------------------------------------------------------------------------------------------------------------------------------------------------------------------------------------------------------------------------------------------------------------------------------------------------------------------------------------------------------------------------------------------------------------------------------------------------------------------------------------|----------------------------------------------------------------------------------|-------------------------------------------------------------------|
| Adsorption equilibrium equations                                                                                                                                                                                                                                                                                                                                                                                                                                                                                                                                                                                                                                                                                                                                                                                                                                                                                                                                                                                                                                                                                                                                                                                                                                                                                                                                                                                                                                                                                                                                                                                                                                                                                                                                                                                                                                                                                                                                                                                                                                                                                                                                                                                                                                                                                                                                                                                                                                                                                                                                                                                                                                                                               | $\% \text{Removal} = 100 \cdot (C_0 - C_e)/C_0$ (1)                              | $Q_e = (C_0 - C_e) \cdot V/W$ (2)                                 |
|                                                                                                                                                                                                                                                                                                                                                                                                                                                                                                                                                                                                                                                                                                                                                                                                                                                                                                                                                                                                                                                                                                                                                                                                                                                                                                                                                                                                                                                                                                                                                                                                                                                                                                                                                                                                                                                                                                                                                                                                                                                                                                                                                                                                                                                                                                                                                                                                                                                                                                                                                                                                                                                                                                                | $K_d = Q_e/C_e$ (3)                                                              | $R_L = 1/(1 + (K_L \cdot C_e))$ (4)                               |
|                                                                                                                                                                                                                                                                                                                                                                                                                                                                                                                                                                                                                                                                                                                                                                                                                                                                                                                                                                                                                                                                                                                                                                                                                                                                                                                                                                                                                                                                                                                                                                                                                                                                                                                                                                                                                                                                                                                                                                                                                                                                                                                                                                                                                                                                                                                                                                                                                                                                                                                                                                                                                                                                                                                | Thermodynamic                                                                    |                                                                   |
|                                                                                                                                                                                                                                                                                                                                                                                                                                                                                                                                                                                                                                                                                                                                                                                                                                                                                                                                                                                                                                                                                                                                                                                                                                                                                                                                                                                                                                                                                                                                                                                                                                                                                                                                                                                                                                                                                                                                                                                                                                                                                                                                                                                                                                                                                                                                                                                                                                                                                                                                                                                                                                                                                                                | $\Delta G^\circ = -R \cdot T(\ln K_d)$ (5)                                       | $\ln K_d = (-\Delta H^\circ/R \cdot T) + (-\Delta S^\circ/R)$ (6) |
|                                                                                                                                                                                                                                                                                                                                                                                                                                                                                                                                                                                                                                                                                                                                                                                                                                                                                                                                                                                                                                                                                                                                                                                                                                                                                                                                                                                                                                                                                                                                                                                                                                                                                                                                                                                                                                                                                                                                                                                                                                                                                                                                                                                                                                                                                                                                                                                                                                                                                                                                                                                                                                                                                                                | Isotherms                                                                        |                                                                   |
|                                                                                                                                                                                                                                                                                                                                                                                                                                                                                                                                                                                                                                                                                                                                                                                                                                                                                                                                                                                                                                                                                                                                                                                                                                                                                                                                                                                                                                                                                                                                                                                                                                                                                                                                                                                                                                                                                                                                                                                                                                                                                                                                                                                                                                                                                                                                                                                                                                                                                                                                                                                                                                                                                                                | Non-linear                                                                       | Linear                                                            |
| Langmuir                                                                                                                                                                                                                                                                                                                                                                                                                                                                                                                                                                                                                                                                                                                                                                                                                                                                                                                                                                                                                                                                                                                                                                                                                                                                                                                                                                                                                                                                                                                                                                                                                                                                                                                                                                                                                                                                                                                                                                                                                                                                                                                                                                                                                                                                                                                                                                                                                                                                                                                                                                                                                                                                                                       | $Q_e = (Q_m \cdot K_L \cdot C_e)/(1 + K_L \cdot C_e)$ (7)                        | $C_e/Q_e = (1/K_L \cdot Q_m) + (C_e/Q_m)$ (8)                     |
| Freundlich                                                                                                                                                                                                                                                                                                                                                                                                                                                                                                                                                                                                                                                                                                                                                                                                                                                                                                                                                                                                                                                                                                                                                                                                                                                                                                                                                                                                                                                                                                                                                                                                                                                                                                                                                                                                                                                                                                                                                                                                                                                                                                                                                                                                                                                                                                                                                                                                                                                                                                                                                                                                                                                                                                     | $Q_e = K_F \cdot C_e^{1/n_F}$ (9)                                                | $\log Q_e = \log K_F + (1/n_F) \log C_e$ (10)                     |
| Temkin                                                                                                                                                                                                                                                                                                                                                                                                                                                                                                                                                                                                                                                                                                                                                                                                                                                                                                                                                                                                                                                                                                                                                                                                                                                                                                                                                                                                                                                                                                                                                                                                                                                                                                                                                                                                                                                                                                                                                                                                                                                                                                                                                                                                                                                                                                                                                                                                                                                                                                                                                                                                                                                                                                         | $Q_e = (R \cdot T/b_T) \ln(K_T \cdot C_e)$ (11)                                  | $Q_e = (R \cdot T/b_T) \ln K_T + (R \cdot T/b_T) \ln C_e$ (12)    |
| Dubinin-Radushkevich (D-R)                                                                                                                                                                                                                                                                                                                                                                                                                                                                                                                                                                                                                                                                                                                                                                                                                                                                                                                                                                                                                                                                                                                                                                                                                                                                                                                                                                                                                                                                                                                                                                                                                                                                                                                                                                                                                                                                                                                                                                                                                                                                                                                                                                                                                                                                                                                                                                                                                                                                                                                                                                                                                                                                                     | $Q_e = Q_m^{DR} \cdot \exp(-K_{DR} \cdot \varepsilon^2)$ (13)                    | $\ln Q_e = \ln Q_m^{DR} - K_{DR} \cdot \varepsilon^2$ (14)        |
| Redlich-Peterson (R-P)                                                                                                                                                                                                                                                                                                                                                                                                                                                                                                                                                                                                                                                                                                                                                                                                                                                                                                                                                                                                                                                                                                                                                                                                                                                                                                                                                                                                                                                                                                                                                                                                                                                                                                                                                                                                                                                                                                                                                                                                                                                                                                                                                                                                                                                                                                                                                                                                                                                                                                                                                                                                                                                                                         | $Q_e = (K_{RP} \cdot C_e)/(1 + \alpha_{RP} \cdot C_e^g)$ where $g \leq 1$ (15)   | -                                                                 |
| Sips                                                                                                                                                                                                                                                                                                                                                                                                                                                                                                                                                                                                                                                                                                                                                                                                                                                                                                                                                                                                                                                                                                                                                                                                                                                                                                                                                                                                                                                                                                                                                                                                                                                                                                                                                                                                                                                                                                                                                                                                                                                                                                                                                                                                                                                                                                                                                                                                                                                                                                                                                                                                                                                                                                           | $Q_e = (Q_{max}^S \cdot K_S \cdot C_e^{1/n_S})/(1 + K_S \cdot C_e^{1/n_S})$ (16) | -                                                                 |
| Koble-Corrigan (K-C)                                                                                                                                                                                                                                                                                                                                                                                                                                                                                                                                                                                                                                                                                                                                                                                                                                                                                                                                                                                                                                                                                                                                                                                                                                                                                                                                                                                                                                                                                                                                                                                                                                                                                                                                                                                                                                                                                                                                                                                                                                                                                                                                                                                                                                                                                                                                                                                                                                                                                                                                                                                                                                                                                           | $Q_e = (A \cdot C_e^\beta)/(1 + B \cdot C_e^\beta)$ (17)                         | -                                                                 |
|                                                                                                                                                                                                                                                                                                                                                                                                                                                                                                                                                                                                                                                                                                                                                                                                                                                                                                                                                                                                                                                                                                                                                                                                                                                                                                                                                                                                                                                                                                                                                                                                                                                                                                                                                                                                                                                                                                                                                                                                                                                                                                                                                                                                                                                                                                                                                                                                                                                                                                                                                                                                                                                                                                                | Kinetics                                                                         |                                                                   |
|                                                                                                                                                                                                                                                                                                                                                                                                                                                                                                                                                                                                                                                                                                                                                                                                                                                                                                                                                                                                                                                                                                                                                                                                                                                                                                                                                                                                                                                                                                                                                                                                                                                                                                                                                                                                                                                                                                                                                                                                                                                                                                                                                                                                                                                                                                                                                                                                                                                                                                                                                                                                                                                                                                                | Non-linear                                                                       | Linear                                                            |
| Pseudo-First order (PFO)                                                                                                                                                                                                                                                                                                                                                                                                                                                                                                                                                                                                                                                                                                                                                                                                                                                                                                                                                                                                                                                                                                                                                                                                                                                                                                                                                                                                                                                                                                                                                                                                                                                                                                                                                                                                                                                                                                                                                                                                                                                                                                                                                                                                                                                                                                                                                                                                                                                                                                                                                                                                                                                                                       | $Q_t = Q_e \cdot (1 - \exp(-k_1 \cdot t))$ (18)                                  | $\log(Q_e - Q_t) = \log Q_e - (k_1 \cdot t/2.303)$ (19)           |
| Pseudo-Second order (PSO)                                                                                                                                                                                                                                                                                                                                                                                                                                                                                                                                                                                                                                                                                                                                                                                                                                                                                                                                                                                                                                                                                                                                                                                                                                                                                                                                                                                                                                                                                                                                                                                                                                                                                                                                                                                                                                                                                                                                                                                                                                                                                                                                                                                                                                                                                                                                                                                                                                                                                                                                                                                                                                                                                      | $Q_t = (k_2 \cdot Q_{e,calc}^2 \cdot t)/(1 + k_2 \cdot Q_{e,calc} \cdot t)$ (20) | $(t/Q_t) = (1/k_2 \cdot Q_e^2) + (t/Q_e)$ (21)                    |
| Elovich                                                                                                                                                                                                                                                                                                                                                                                                                                                                                                                                                                                                                                                                                                                                                                                                                                                                                                                                                                                                                                                                                                                                                                                                                                                                                                                                                                                                                                                                                                                                                                                                                                                                                                                                                                                                                                                                                                                                                                                                                                                                                                                                                                                                                                                                                                                                                                                                                                                                                                                                                                                                                                                                                                        | $Q_t = (1/\beta) \ln h \cdot \beta + (1/\beta) \ln t$ (22)                       | $Q_t = (1/\beta) \ln h \cdot \beta + (1/\beta) \ln t$ (23)        |
| Intra-particle diffusion (IPD)                                                                                                                                                                                                                                                                                                                                                                                                                                                                                                                                                                                                                                                                                                                                                                                                                                                                                                                                                                                                                                                                                                                                                                                                                                                                                                                                                                                                                                                                                                                                                                                                                                                                                                                                                                                                                                                                                                                                                                                                                                                                                                                                                                                                                                                                                                                                                                                                                                                                                                                                                                                                                                                                                 | $Q_t = k_{IPD} \cdot t^{0.5} + C$ (24)                                           | $Q_t = k_{IPD} \cdot t^{0.5} + C$ (25)                            |
| <b>Nomenclature:</b>                                                                                                                                                                                                                                                                                                                                                                                                                                                                                                                                                                                                                                                                                                                                                                                                                                                                                                                                                                                                                                                                                                                                                                                                                                                                                                                                                                                                                                                                                                                                                                                                                                                                                                                                                                                                                                                                                                                                                                                                                                                                                                                                                                                                                                                                                                                                                                                                                                                                                                                                                                                                                                                                                           |                                                                                  |                                                                   |
| <p><math>C_0</math> (mg·L<sup>-1</sup>): Adsorbate initial concentration; <math>C_e</math> (mg·L<sup>-1</sup>): Equilibrium concentration; <math>Q_e</math> (mg·g<sup>-1</sup>): Amount of adsorbate in the adsorbent at equilibrium (adsorption capacity); <math>Q_t</math> (mg·g<sup>-1</sup>): Amount of adsorbate in the adsorbent at any time <math>t</math>; <math>Q_{e,calc}</math> (mg·g<sup>-1</sup>): calculated amount of adsorbate in equilibrium; <math>Q_m</math> (mg·g<sup>-1</sup>): Maximum monolayer coverage capacities; <math>Q_m^{DR}</math> (mg·g<sup>-1</sup>): D-R maximum adsorption capacity; <math>R_L</math>: Separation factor; Calculated adsorption capacity; <math>K_d</math> (L·g<sup>-1</sup>): distribution coefficient; <math>K_L</math> (L·mg<sup>-1</sup>): Langmuir isotherm constant; <math>K_{DR}</math> (mol<sup>2</sup>·kJ<sup>-2</sup>): Dubinin–Radushkevich isotherm constant; <math>K_F</math> (mg·g<sup>-1</sup>): Freundlich constant related to the rate of adsorption; <math>K_{RP}</math> (L·g<sup>-1</sup>): Redlich–Peterson isotherm constant; <math>K_{max}^S</math> (L·mg<sup>-1</sup>): Sips isotherm model constant; <math>K_T</math> (L·g<sup>-1</sup>): Temkin isotherm equilibrium binding constant; <math>k_1</math> (min<sup>-1</sup>): Rate constant of the pseudo-first-order kinetic model; <math>k_2</math> (g·mg<sup>-1</sup>·min<sup>-1</sup>): Rate constant of the pseudo-first-order kinetic model; <math>k_{IPD}</math> (mg·g<sup>-1</sup>·min<sup>-1</sup>): ; <math>\alpha_{RP}</math> (mg<sup>-1</sup>): Redlich–Peterson isotherm constant; <math>b_T</math> (kJ·mol<sup>-1</sup>): Temkin isotherm constant related to the heat of sorption; <math>n_F</math>: adsorption intensity; <math>n_S</math>: Sips isotherm model exponent; <math>Q</math>: Adsorption intensity; <math>Q</math>: Dubinin–Radushkevich isotherm constant (<math>Q</math> (Polanyi potential) is equal to <math>RT \ln(1 + 1/C_e)</math>); <math>A</math> (L<sup>n</sup>·mg<sup>1-n</sup>·g<sup>-1</sup>): Koble–Corrigan isotherm constant; <math>B</math> ((L·mg<sup>-1</sup>)<sup>n</sup>): Koble–Corrigan isotherm constant (L·mg<sup>-1</sup>)<sup>n</sup>; <math>R</math> (8.314 J·K<sup>-1</sup>·mol<sup>-1</sup>): Universal gas constant ; <math>V</math> (L): Volume of the aqueous phase; <math>W</math> (g): Dry weight of the adsorbent; <math>T</math> (K): Temperature; <math>\Delta G^\circ</math> (kJ·mol<sup>-1</sup>): Standard Gibbs free energy change; <math>\Delta H^\circ</math> (kJ·mol<sup>-1</sup>): Standard enthalpy change; <math>\Delta S^\circ</math> (J·K<sup>-1</sup>·mol<sup>-1</sup>): Standard entropy change.</p> |                                                                                  |                                                                   |

**Table S2.** Comparison of the adsorption isotherms, kinetics, and thermodynamic constants.

| Thermodynamic                                        |         |         |                                                      |                                                                    |  |  |
|------------------------------------------------------|---------|---------|------------------------------------------------------|--------------------------------------------------------------------|--|--|
| $\Delta G^\circ / (\text{kJ} \cdot \text{mol}^{-1})$ |         |         | $\Delta H^\circ / (\text{kJ} \cdot \text{mol}^{-1})$ | $\Delta S^\circ / (\text{J} \cdot \text{K} \cdot \text{mol}^{-1})$ |  |  |
| 293 K                                                | 313 K   | 333 K   |                                                      |                                                                    |  |  |
| -10.670                                              | -5.2550 | -1.8150 | -75.8570                                             | -223.4637                                                          |  |  |

  

| Isotherm          |           |                                                   |                                         | Kinetic |                    |                                                     |                                                             |                      |
|-------------------|-----------|---------------------------------------------------|-----------------------------------------|---------|--------------------|-----------------------------------------------------|-------------------------------------------------------------|----------------------|
| <b>Langmuir</b>   | $R^2$     | $Q_m / \text{mg} \cdot \text{g}^{-1}$             | $K_L / \text{L} \cdot \text{mg}^{-1}$   | PFO     | $R^2$              | $k_1 / \text{min}^{-1}$                             |                                                             |                      |
|                   | Nonlinear | 0.9688                                            | 569.049                                 | 0.0307  | Nonlinear          | 0.8855                                              | 1.9321                                                      |                      |
|                   | Linear    | 0.9910                                            | 555.555                                 | 0.0508  | Linear             | 0.9932                                              | 0.0836                                                      |                      |
| <b>Freundlich</b> | $R^2$     | $K_F / \text{mg} \cdot \text{g}^{-1}$             | $n_F$                                   | PSO     | $R^2$              | $Q_{e,\text{calc}} / \text{mg} \cdot \text{g}^{-1}$ | $k_2 / \text{g} \cdot \text{mg}^{-1} \cdot \text{min}^{-1}$ |                      |
|                   | Nonlinear | 0.8851                                            | 38.897                                  | 1.000   | Non-linear         | 0.8122                                              | 296.794                                                     | 0.0511               |
|                   | Linear    | 0.9012                                            | 56.754                                  | 2.236   | Linear             | 0.9999                                              | 294.118                                                     | 0.0385               |
| <b>Temkin</b>     | $R^2$     | $K_T / \text{L} \cdot \text{g}^{-1}$              | $b_T / \text{kJ} \cdot \text{mol}^{-1}$ | Elovich | $R^2$              | $\beta$                                             | $h$                                                         |                      |
|                   | Nonlinear | 0.9373                                            | 1.9172                                  | 32.5338 | Nonlinear          | 0.7401                                              | 0.3448                                                      | $2.6 \times 10^{43}$ |
|                   | Linear    | 0.9321                                            |                                         | 31.7312 | Linear             | 0.9790                                              | 0.5415                                                      | $2.6 \times 10^{68}$ |
| <b>D-R</b>        | $R^2$     | $Q_m^{\text{DR}} / \text{mg} \cdot \text{g}^{-1}$ | $\epsilon$                              | IPD     | $R^2$              | $K_{\text{IPD}} / \text{L} \cdot \text{g}^{-1}$     | $C$                                                         |                      |
|                   | Nonlinear | 0.8179                                            | 449.0837                                | 1       | Non-linear         | 0.9505                                              | 0.9563                                                      | 290.45               |
|                   | Linear    | 0.7779                                            |                                         |         | Linear 1 ( $y_1$ ) | 0.9956                                              | 1.3082                                                      | 289.49               |
| <b>R-P</b>        | $R^2$     | $K_{\text{RP}} / \text{L} \cdot \text{g}^{-1}$    | $\alpha_{\text{RP}} / \text{mg}^{-1}$   | $g$     | Linear 2 ( $y_2$ ) | 0.9486                                              | 0.2121                                                      | 295.37               |
|                   | Nonlinear | 0.9798                                            | 94.884                                  | 0.8006  | 0.7237             |                                                     |                                                             |                      |
| <b>Sips</b>       | $R^2$     | $Q_m^{\text{S}} / \text{mg} \cdot \text{g}^{-1}$  | $K_S / \text{L} \cdot \text{mg}^{-1}$   | $n_S$   |                    |                                                     |                                                             |                      |
|                   | Nonlinear | 0.9625                                            | 569.473                                 | 7.407   | 2.415              |                                                     |                                                             |                      |
| <b>K-C</b>        | $R^2$     | $A$                                               | $B$                                     | $\beta$ |                    |                                                     |                                                             |                      |
|                   | Nonlinear | 0.9623                                            | 17.830                                  | 0.0312  | 1                  |                                                     |                                                             |                      |

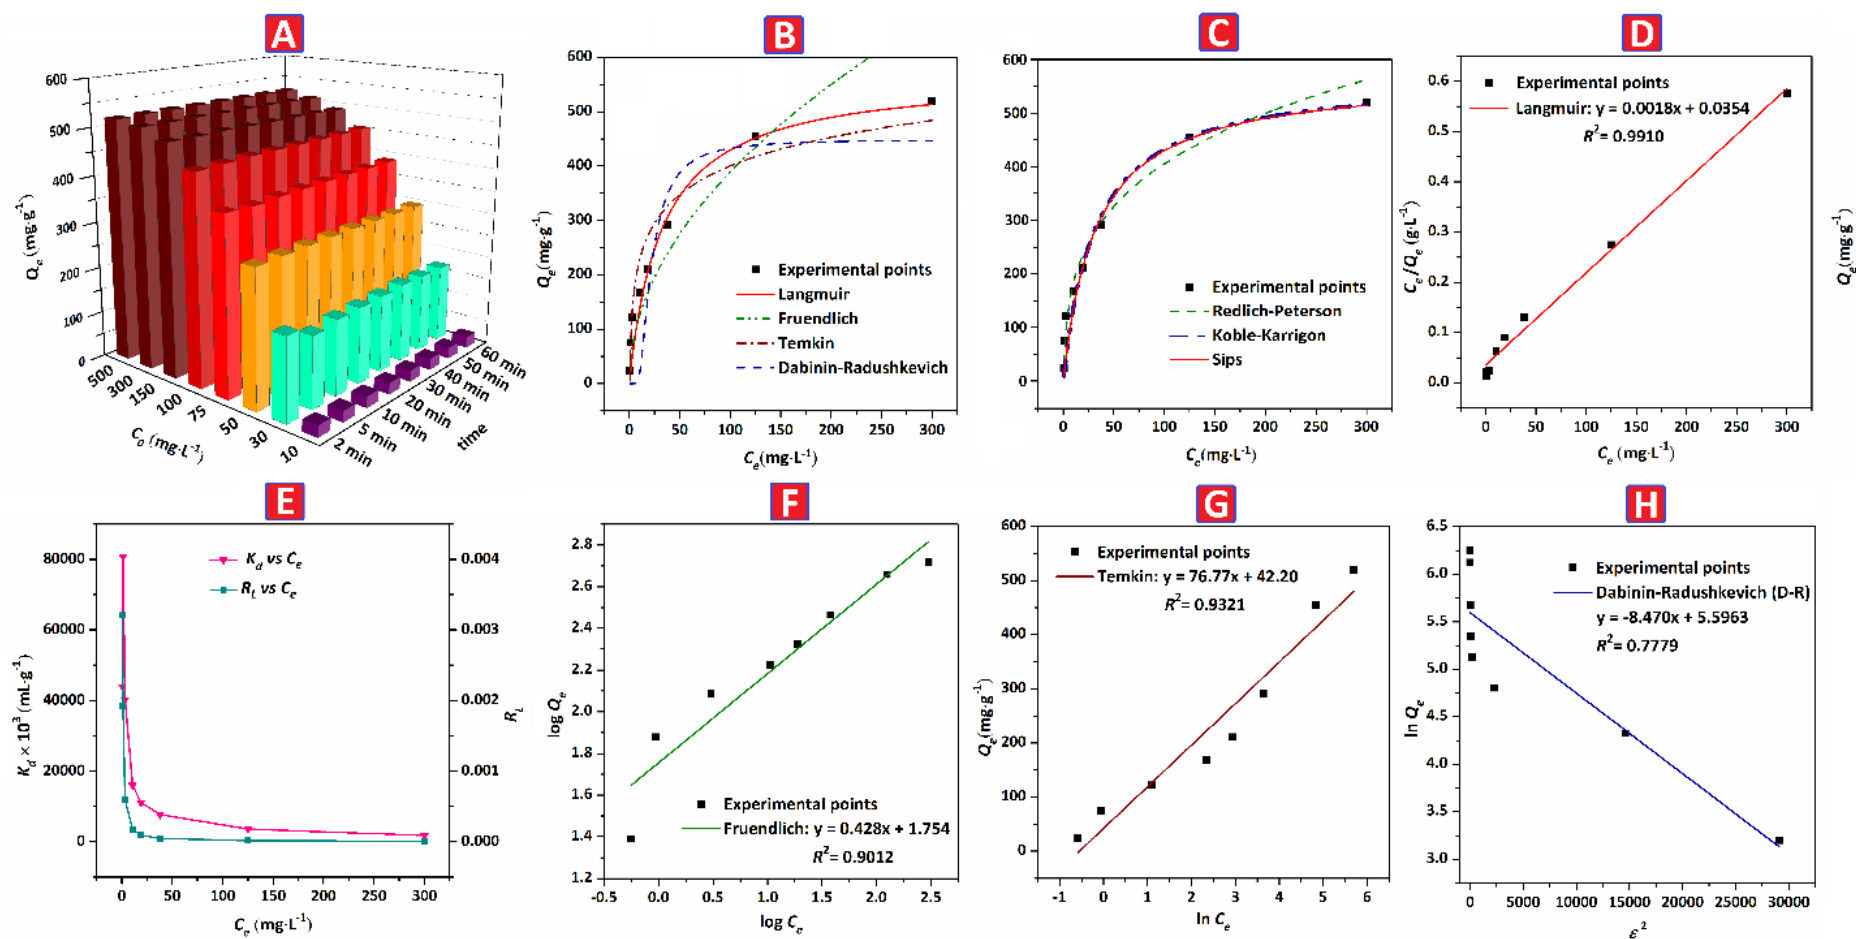

**Figure S1.** (A) Time-concentration profile for the MB adsorption onto the RS-3. (B) The Langmuir, Freundlich, Temkin, D-R and (C) R-P, K-C and Sips isotherms plots in the non-linear regression analysis. (D) The Langmuir, (F) Freundlich, (G) Temkin, and (H) D-R isotherms plots in the linear regression analysis. (E) the values of  $R_L$  and  $K_d$ .

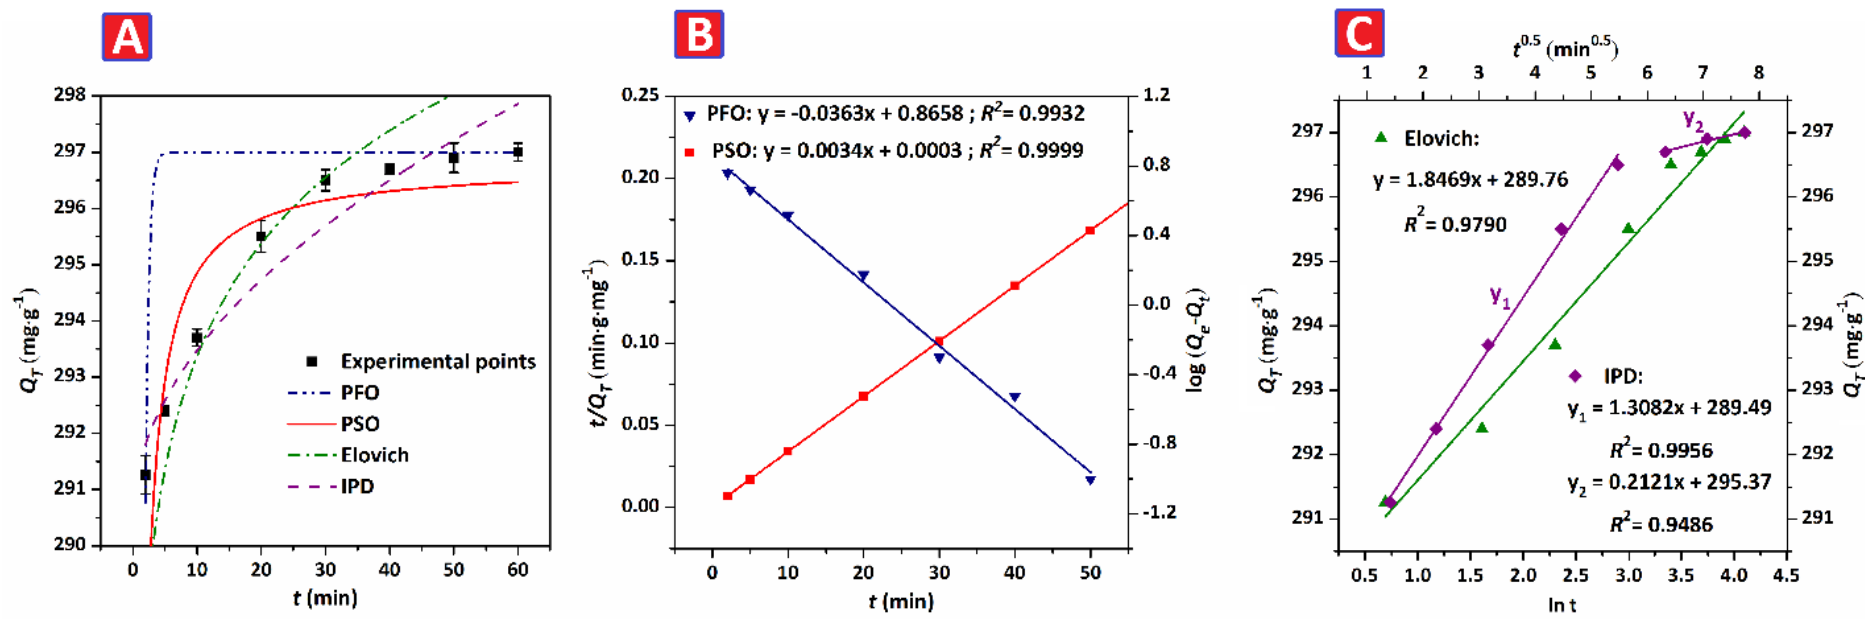

**Figure S2.** (A) The PFO, PSO, Elovich, and IPD kinetics plots in the non-linear regression analysis. (B) The PFO, PSO, (C) Elovich, and IPD kinetics plots in the linear regression analysis.
